# Supplementary material for: Rapid microfluidics prototyping through variotherm desktop injection molding for multiplex diagnostics
Source: Royal Society of Chemistry journal article supplement (doi:10.1039/d3lc00391d), 2023-01-01
Supplement: d3lc00391d1.pdf [file d3lc00391d1.pdf]

## Supporting Information

### Rapid Microfluidics Prototyping Through Variotherm Desktop Injection Molding for Multiplex Diagnostics

Gianmarco D. Suarez,<sup>a</sup> Steevanson Bayer,<sup>a</sup> Yuki Yu Kiu Tang,<sup>c</sup> Domenick A. Suarez,<sup>c</sup> Peter Pak-Hang Cheung<sup>b\*</sup> and Stefan Nagl<sup>a\*</sup>

<sup>a</sup>Department of Chemistry, The Hong Kong University of Science and Technology, Clear Water Bay, Kowloon, Hong Kong

<sup>b</sup>Department of Chemical Pathology, The Chinese University of Hong Kong, Shatin, New Territories, Hong Kong

<sup>c</sup>Quommi Technologies Limited, Tsuen Wan, New Territories, Hong Kong

\*To whom correspondence may be addressed. E-mail: [chnagl@ust.hk](mailto:chnagl@ust.hk), [ppcheung@cuhk.hk.edu](mailto:ppcheung@cuhk.hk.edu)

### Table of Contents

|                                                                             |    |
|-----------------------------------------------------------------------------|----|
| Technical Considerations for the Centrifugal Microfluidic Design .....      | 2  |
| Design of Custom Imaging Rig.....                                           | 3  |
| Supplementary Figure 1: Imaging Rig Design and Fabrication.....             | 3  |
| Supplementary Figure 2: Imaging Rig Calibration.....                        | 4  |
| Fabrication of Injection Molding Assembly .....                             | 5  |
| Supplementary Figure 3: Injection Molding Assembly Diagrams .....           | 6  |
| Supplementary Figure 4: Injection Molding Assembly and Platens .....        | 7  |
| Supplementary Table 1: Commercially Available CYP2C19 Testing Systems ..... | 8  |
| Supplementary Table 2: Machining Parameters .....                           | 9  |
| Supplementary Table 3: Primer and Gene Fragment Sequences .....             | 10 |
| Supplementary Table 4: AS-LAMP Time-to-Results .....                        | 11 |
| Supplementary References.....                                               | 11 |

## Technical Considerations for the Centrifugal Microfluidic Design

The central filling mechanism of the centrifugal microfluidic chip is designed such that excess fluid is released through the gas outlets. This is achieved by designing the gas outlet with a lower capillary pressure than the first valve (i.e., the passive capillary valve between the central chamber and downstream microfluidics). This is done according to the following formula<sup>1,2</sup>:

$$P_S = a \left( \frac{4\gamma}{D_h} \right) + b \quad (1)$$

where  $P_S$  is the capillary pressure,  $a$  and  $b$  are empirically determined constants,  $\gamma$  is the liquid's surface tension, and  $D_h$  is the channel's hydraulic diameter. Capitalizing on the inverse relationship between hydraulic diameter and capillary pressure, we designed the gas outlet ( $D_h = 1$  mm) to have a capillary pressure approximately less than half that of the first valve ( $D_h = 0.41$  mm). The circular gas outlet thus had a diameter of 1 mm while the dimensions of the first valves were 0.4 mm by 0.42 mm  $w \times h$ .

The first and second valve (the second valves separate the metering and reaction chambers) sets were configured to provide a reliable separation of rotational burst frequencies. In guiding our design, we used the following formula<sup>1,2</sup> to determine suitable valve dimensions:

$$P_\omega = \rho \omega^2 \bar{r} \Delta r > P_S \quad (2)$$

where  $P_\omega$  is the centrifugally induced pressure,  $\rho$  is the liquid density,  $\omega$  is the rotational frequency,  $\bar{r}$  is the mean radial distance of the liquid from the rotational center,  $\Delta r$  is the liquid's radial height. Based on this relation, we determined that for any given angular frequency,  $P_\omega$  would be 3-fold higher at the second valves as compared to the first valves. Therefore, we selected valve dimensions such that the first valves' hydraulic diameter was 3.4 times as large as that of the second valves, yielding second valves 100  $\mu\text{m}$  wide and 150  $\mu\text{m}$  high.

## Design of Custom Imaging Rig

The design of the custom imaging rig drew inspiration from a layout reported by Xue et al.<sup>3</sup> In particular, the aspect of obliquely illuminating the subject while imaging from above was incorporated in order to provide for a straightforward setup of the optics needed to fluorescently image the centrifugal microfluidics. Blue light from a hexagonally arranged array of LEDs was first bandpass filtered into a complementary array of optical light guides (one light guide per LED). The light guides transmitted the excitation light to the reaction chambers of the centrifugal microfluidic chip at an oblique angle, while emissions from the optical pH sensors were filtered and imaged from above (Supp. Fig. 1A). To construct this design, various parts were 3D-printed to properly position the optical components with respect to one another (Supp. Fig. 1B). Ultimately, by using optical light guides, the need for a collimating lens, diffuser, and dichroic mirror was obviated, reducing the cost of the imaging rig and making it compact.

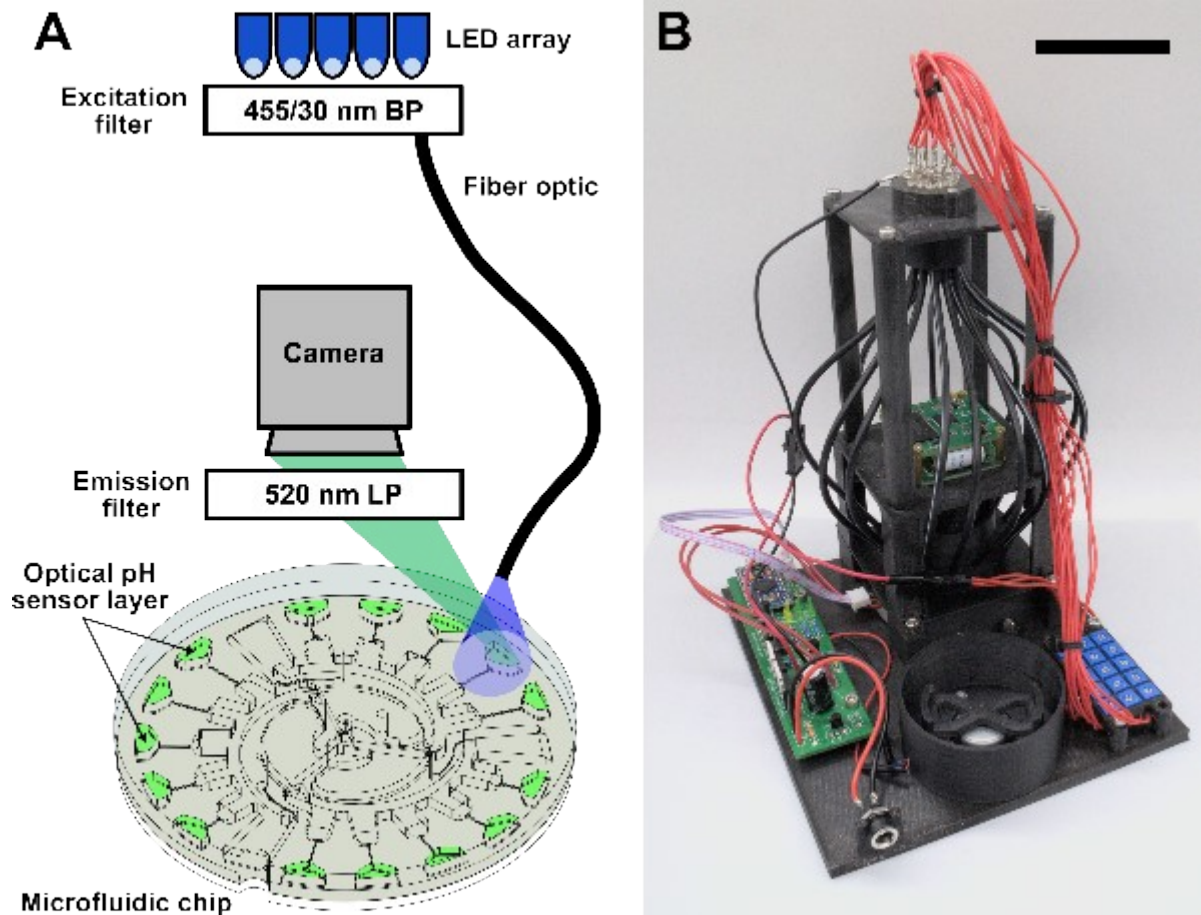

**Supplementary Figure 1:** a) Diagram of optical components used in imaging rig. b) Photograph of imaging rig. Scale bar is 5 cm.

Aside from positioning the optical components, the 3D-printed parts also supported other essential components of the imaging rig, such as the microcontroller and the heat block. The heat block was designed to slide under the optical assembly (Supp. Fig. 2A), to make loading of the chips easier. To verify the functionality of all these components as assembled, fluorescent control chips were employed. To define regions of interest that correspond to the reaction chambers, a dummy chip was used that had 5  $\mu\text{L}$  of fluorescent green enamel paint (Testors, United States) deposited and dried into the reaction chambers (Supp. Fig. 2B). Using these regions of interest (ROIs), the blue light emission of the individual light guides was adjusted using another fluorescent control made by CNC milling a piece of fluorescent green acrylic (Marga Cipta, Indonesia) into the profile of the microfluidic chips (Supp. Fig. 2C). Since each LED was connected to a separate variable resistor, the blue light each ROI received could be tuned to equalize measured emissions. This was accomplished, with a coefficient of variation of only 0.59 % achieved between the ROIs (Supp. Fig. 2D). This indicated that the optical assembly was suitable for fluorescence measurements during LAMP.

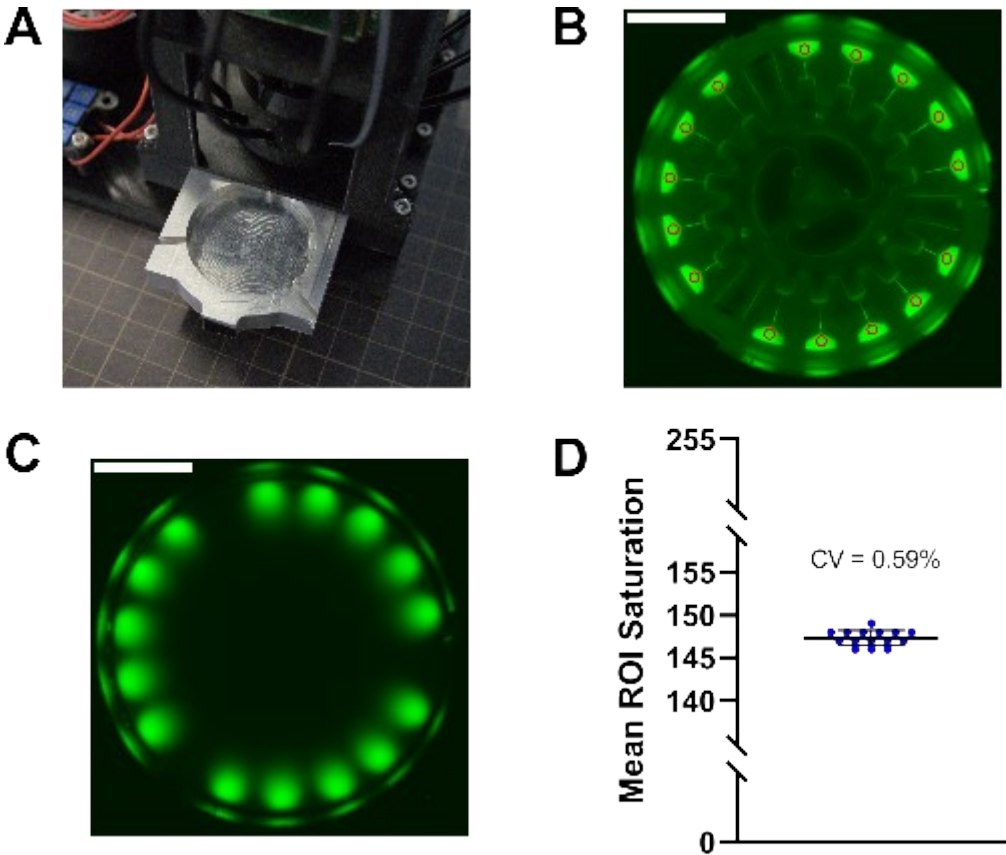

**Supplementary Figure 2:** a) Heat block extended from imaging rig. Images of b) fluorescent enamel chip control with regions of interest indicated by red circles and c) fluorescent acrylic standard used for calibration. Scale bars are 1 cm. d) Mean saturation of regions of interest on fluorescent acrylic standard.

## **Fabrication of Injection Molding Assembly**

The injection molding assembly was constructed from both custom-milled aluminum parts and standard parts (Supp. Fig. 3A). These standard parts included the pins, guide pins and bushings, and springs. The remaining parts were custom.

The bottom plate served as the base for moveable portion of the assembly and guided the ejector knockout pins. When the platens of the injection molder are moved apart and the mold is opened, these knockout pins engage with an aluminum plate behind the B platen. The ejector knockout pins push the ejector plate, which in turn pushes the ejector return pins, sprue knockout pin, and ejector pins into their corresponding holes within the B plate. The ejector retainer plate is joined with screws and nuts to the ejector plate, to secure the heads of the pins. The springs on the ejector return pins push the ejector retainer plate and ensure the pins are restored to their original position when the mold is closed again. This ejector assembly is contained within a space behind the B plate formed by the spacer blocks.

The ejector return pins are thicker than the ejector pins and serve as guides for the movement of the ejector pins. The ejector pins engage with the molded plastic part and force it from the B cavity of the mold. The sprue knockout pin shears the molded sprue from the annular ring sprue pullers, helping to completely release the part.

The B plate is movable and hosts the B cavity with the microfluidic features, the annular ring sprue puller which removes the sprue and molded part from the A plate, and half of the circular runner which guides molten plastic to the cavities. The A plate is immobile and hosts the A cavity with features that form through-holes in the molded part, the other half of the runner, and the sprue which conducts plastic from the injection barrel to the runner. The A and B plates are aligned to each other with the aid of guide pins and bushings. These pins and bushings are inserted near the corners of the plates and ensure that the cavity halves register correctly. The sprue bushing plate sits between the A plate and the A platen and serves as an adaptor between the injection barrel nozzle and the sprue. The positioning of all these parts and there assembly is illustrated by the perspective diagrams in supplementary figure 3 B,C.

An important consideration in designing the molding assembly is the layout of the platens (Supp. Fig. 4 A,B). The platens had 7 mm wide through-holes which were spaced either 1 or 2 cm from their neighbors, depending on orientation. Therefore, the size and placement of these holes was considered when determining how to place nuts, bolts, and pins for securing the injection molding assembly to the platens and ensuring proper function.



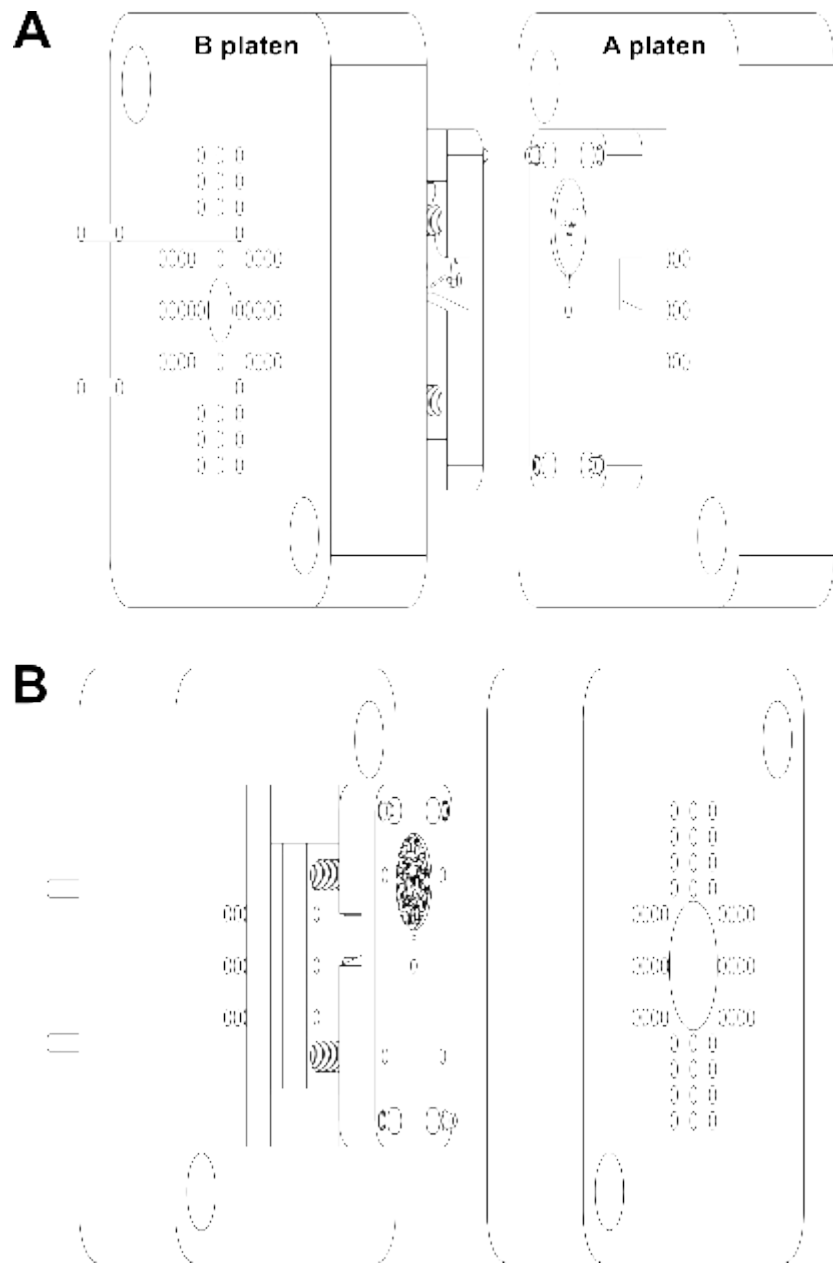

**Supplementary Figure 4:** Perspective schematics of injection mold assembly mounted on platens showing a) the A plate and b) the B plate.

**Supplementary Table 1:** A list of FDA-approved medical devices for performing CYCP2C19 genotyping. This list was obtained by searching “CYP2C19” through the Devices@FDA database (<https://www.accessdata.fda.gov/scripts/cdrh/devicesatfda/index.cfm>).

| <b>Device Name</b>                         | <b>Company</b>                     | <b>Date Approved</b> | <b>Methodology</b>                           | <b>Readout</b> |
|--------------------------------------------|------------------------------------|----------------------|----------------------------------------------|----------------|
| Infiniti CYP2C19 Assay                     | Autogenomics Incorporated          | 10/25/2010           | PCR and microarray                           | Fluorescence   |
| Verigene CYCP2C19 Nucleic Acid Test (2C19) | Nanosphere Inc.                    | 11/6/2012            | Gold nanoparticle probe and oligo microarray | Fluorescence   |
| Spartan RX CYP2C19 Test System             | Spartan Bioscience Inc.            | 8/12/2013            | PCR                                          | Fluorescence   |
| xTAG CYP2C19 Kit v3                        | Luminex Molecular Diagnostics Inc. | 9/11/2013            | PCR and bead-based hybridization             | Fluorescence   |
| Genomadix Cube CYP2C19 System              | Genomadix Inc.                     | 3/21/2023            | PCR                                          | Fluorescence   |



**Supplementary Table 2:** Machining parameters are listed for the various tools used in this work.

| Tool Number | Tool Type                 | Tool Diameter (mm) | Number of Flutes | Shank Diameter (mm) | Overall Tool Length (mm) | Neck Length (mm) | Horizontal Speed (mm/s) | Vertical Speed (mm/s) | Spindle Speed (rpm) | Stock Material | Flood Coolant? | Operations Used For                                                |
|-------------|---------------------------|--------------------|------------------|---------------------|--------------------------|------------------|-------------------------|-----------------------|---------------------|----------------|----------------|--------------------------------------------------------------------|
| 1           | Square End Mill           | 6                  | 4                | 6                   | 50                       | N/A              | 10                      | 1                     | 18000               | Al (6061-T6)   | Yes            | Profiling mold plates, machining holes                             |
| 2           | Long-neck Square End Mill | 1.5                | 2                | 4                   | 50                       | 20               | 2                       | 0.5                   | 24000               | Al (6061-T6)   | Yes            | Machining ejector pin holes                                        |
| 3           | Square End Mill           | 4                  | 4                | 4                   | 50                       | N/A              | 10                      | 1                     | 24000               | Al (6061-T6)   | Yes            | Machining holes, heating cavities                                  |
| 4           | Square End Mill           | 3                  | 4                | 3                   | 50                       | N/A              | 7.5                     | 0.5                   | 24000               | Al (6061-T6)   | Yes            | Machining holes                                                    |
| 5           | Square End Mill           | 2                  | 4                | 4                   | 50                       | N/A              | 5                       | 1                     | 24000               | Al (6061-T6)   | Yes            | Machining holes                                                    |
| 6           | Square End Mill           | 1                  | 4                | 4                   | 50                       | N/A              | 1.5                     | 0.5                   | 24000               | Al (6061-T6)   | Yes            | Machining gates                                                    |
| 7           | Ball End Mill             | 4                  | 2                | 4                   | 50                       | N/A              | 2.5                     | 0.5                   | 24000               | Al (6061-T6)   | Yes            | Machining runners                                                  |
| 8           | Square End Mill           | 0.8                | 2                | 4                   | 50                       | N/A              | 2                       | 0.5                   | 24000               | Al (6061-T6)   | Yes            | Machining A plate cavity                                           |
| 9           | Square End Mill           | 0.4                | 2                | 4                   | 50                       | N/A              | 2                       | 0.5                   | 24000               | Al (6061-T6)   | Yes            | Machining B plate cavity                                           |
| 10          | Chamfer End Mill          | 6                  | 3                | 6                   | 50                       | N/A              | 10                      | 1                     | 24000               | Al (6061-T6)   | Yes            | Chamfering B plate pin holes                                       |
| 11          | Undercutting End Mill     | 2                  | 2                | 4                   | 50                       | N/A              | 0.5                     | 0.5                   | 24000               | Al (6061-T6)   | Yes            | Machining annular ring sprue puller                                |
| 12          | Thread Mill               | M3                 | 3                | 4                   | 50                       | N/A              | 0.8                     | 0.8                   | 24000               | Al (6061-T6)   | Yes            | Threading holes for mounting MCH element retainer plate            |
| 13          | O-flute End Mill          | 1                  | 1                | 3.175               | 40                       | N/A              | 5                       | 5                     | 2400                | Polystyrene    | No             | Post-processing injection molded parts, cutting plastic substrates |
| 14          | O-flute End Mill          | 2                  | 1                | 3.175               | 40                       | N/A              | 10                      | 0.5                   | 12000               | PMMA           | No             | Cutting custom fluorescent acrylic standards                       |

**Supplementary Table 3: Primer and gene fragment sequences used in this study.**

| <b>Primer Name</b> | <b>Primer Sequence (5'-3')</b>                |
|--------------------|-----------------------------------------------|
| WT*2_FIP           | CCGGGAAATAATCTTTTAATTTAATAAATTATTGTTTTCTCTTAG |
| WT*2_BIP           | CGGGAACCCGTGTTCTTTTACTTTCTCC                  |
| MUT*2_FIP          | CTGGGAAATAATCTTTTAATTTAATAAATTATTGTTTTCTCTTAG |
| MUT*2_BIP          | CAGGAACCCGTGTTCTTTTACTTTCTCC                  |
| *2_Loop_F          | GATAGTGGGAAAATTATTGC                          |
| *2_Loop_B          | CAAATTAATAAAAACCTTGCTT                        |
| *2_F3              | CCAGAGCTTGGCATATTGTATC                        |
| *2_B3              | AGGGTTGTTGATGTCCAT                            |
| WT*3_FIP           | TCCAGGGGTCTTAACTTGATGGAAAAAT                  |
| WT*3_BIP           | GGATCCAGGCCAGAAAAAAGACTGT                     |
| MUT*3_FIP          | TTCAGGGGTCTTAACTTGATGGAAAAAT                  |
| MUT*3_BIP          | GAATCCAGGCCAGAAAAAAGACTGT                     |
| *3_Loop_F          | GCTTACAATCCTGATGTT                            |
| *3_Loop_B          | GTAAGGCCAAGTTTTTTG                            |
| *3_F3              | TCCAGAAACGTTTCG                               |
| *3_B3              | AGGGCTTGGTCAATA                               |

  

| <b>Gene Fragment</b>            | <b>Sequence (5'-3')</b>                                                                                                                                                                                                                                                                                                                                                                                                                                                                                                                         |
|---------------------------------|-------------------------------------------------------------------------------------------------------------------------------------------------------------------------------------------------------------------------------------------------------------------------------------------------------------------------------------------------------------------------------------------------------------------------------------------------------------------------------------------------------------------------------------------------|
| <b>CYP2C19 *2 Fragment</b>      | AAATTACAACCAGAGCTTGGCATATTGTATCTATACCTTTATTAAT<br>GCTTTTAATTTAATAAATTATTGTTTTCTCTTAGATATGCAATAATTT<br>TCCCCTATCATTGATTATTTCCCAGGAACCCATAACAAATTA<br>AAAAACCTTGCTTTTATGGAAAGTGATATTTTGGAGAAAAGTAAAAG<br>AACACCAAGAATCGATGGACATCAACAACCTCGGGACTTTATTG<br>ATTGCTTC                                                                                                                                                                                                                                                                                 |
| <b>CYP2C19 *3 Fragment</b>      | CTGCTCCATTATTTTCCAGAAACGTTTCGATTATAAAGATCAGCAA<br>TTTCTTAACTTGATGGAAAAATTGAATGAAAACATCAGGATTGTAA<br>GCACCCCTGAATCCAGGTAAGGCCAAGTTTTTTGCTTCCTGAGA<br>AACCCTTACAGTCTTTTTTTCTGGGAAATCCAAAATTCTATATTGA<br>CCAAGCCCTGAAGTACATTTTGAATACTACAGTCTTGCCTAGACA<br>GCCATGGGGT                                                                                                                                                                                                                                                                               |
| <b>CYP2C19 WT Dual Fragment</b> | GTGATCTGCTCCATTATTTTCCAGAAACGTTTCGATTATAAAGATC<br>AGCAATTTCTTAACTTGATGGAAAAATTGAATGAAAACATCAGGAT<br>TGTAAGCACCCCCTGGATCCAGGTAAGGCCAAGTTTTTTGCTTCC<br>TGAGAAACCACTTACAGTCTTTTTTTCTGGGAAATCCAAAATTCTA<br>TATTGACCAAGCCCTGAAGTACATTTTGAATACTACAGTCTTGCC<br>TAGACAGCCATGGGGTAAATTACAACCAGAGCTTGGCATATTGTA<br>TCTATACCTTTATTAATGCTTTTAATTTAATAAATTATTGTTTTCTC<br>TTAGATATGCAATAATTTTCCCCTATCATTGATTATTTCCCGGGAA<br>CCCATAACAAATTAATAAAAACCTTGCTTTTATGGAAAGTGATATT<br>TTGGAGAAAAGTAAAAGAACACCAAGAATCGATGGACATCAACAAC<br>CCTCGGGACTTTATTGATTGCTTCCTGAT |

**Supplementary Table 4:** Average time to results (TTR) for AS-LAMP genotyping reactions.

| <b>Allele Analog</b> | <b>TTR (minutes)</b> |
|----------------------|----------------------|
| *2 WT                | 35.3                 |
| *2 Mutant            | 40.6                 |
| *3 WT                | 45.3                 |
| *3 Mutant            | 32.0                 |

### Supplementary References

- 1 R. Gorkin, J. Park, J. Siegrist, M. Amasia, B. S. Lee, J. M. Park, J. Kim, H. Kim, M. Madou and Y. K. Cho, *Lab Chip*, 2010, **10**, 1758–1773.
- 2 D. C. Duffy, H. L. Gillis, J. Lin, N. F. Sheppard and G. J. Kellogg, *Anal. Chem.*, 1999, **71**, 4669–4678.
- 3 Y. Xue, I. G. Davison, D. A. Boas and L. Tian, *Sci. Adv.*, 2020, **6**, eabb7508.
